# Supplementary material for: Screening and Biocontrol Potential of Rhizobacteria Native to Gangetic Plains and Hilly Regions to Induce Systemic Resistance and Promote Plant Growth in Chilli against Bacterial Wilt Disease
Source: MDPI journal article supplement (doi:10.3390/plants10102125), 2021-10-07
Supplement: s1 [file s1]

**Supplementary Table S1.** Characterization of rhizobacteria isolates on the basis of colonies morphology isolated from rhizospheric soil of chilli from different agro-climatic regions of India.

| Isolates | Size       | shape     | Margin       | Opacity          | Elevation | Texture       | Pigmentation    |
|----------|------------|-----------|--------------|------------------|-----------|---------------|-----------------|
| KA2      | Large      | Round     | Entire round | Opaque           | Convex    | Smooth        | Off white       |
| KA3      | Large      | Round     | Entire round | Opaque           | Concave   | Smooth        | Creamy-white    |
| KA5      | Medium     | Round     | Entire round | Transparent      | Flat      | Smooth        | -               |
| KA7      | Large      | Irregular | Filamentous  | Opaque           | Flat      | Rough         | Off-white       |
| KA9      | Medium     | Round     | thick ridges | opaque           | Convex    | smooth, moist | Gray-white      |
| KA13     | Large      | Uniform   | Undulate     | Opaque           | Flat      | Rough         | White           |
| KA14     | Large      | Regular   | Entire round | Opaque           | Convex    | Smooth        | Greenish yellow |
| KA15     | Small      | Regular   | Entire round | Opaque           | Convex    | Smooth        | Light red       |
| KA17     | Small      | Irregular | Entire round | Opaque           | Convex    | Smooth        | Light yellow    |
| AP8      | Large      | Round     | Undulate     | Semi-transparent | Flat      | Slummy -rough | Off-white       |
| AP13     | Large      | Irregular | Undulate     | Opaque           | Flat      | Smooth        | Greenish yellow |
| AP2      | Small      | Round     | Entire round | Opaque           | Convex    | Smooth        | White           |
| AP6      | Large      | Irregular | Entire round | Opaque           | Flat      | Smooth        | Pale yellow     |
| AP11     | Small      | Uniform   | Entire round | Transparent      | Convex    | Smooth-slums  | -               |
| UK2      | Medium     | Uniform   | Entire round | Semi-transparent | Flat      | Smooth        | Light brown     |
| UK6      | Very small | Uniform   | Entire round | Opaque           | Flat      | Smooth        | Greenish yellow |
| UK4      | Medium     | Irregular | Undulate     | Opaque           | Flat      | Irregular     | White           |
| UK7      | Medium     | Uniform   | Entire round | Opaque           | Flat      | Smooth-shiny  | Off-white       |
| UK8      | Large      | Uniform   | Entire round | Semi-transparent | Flat      | Smooth-shiny  | -               |
| UP2      | Small      | Uniform   | Entire round | Opaque           | Convex    | Smooth        | Off- white      |
| BDS1     | Medium     | Round     | thick ridges | opaque           | Convex    | smooth, moist | Gray-white      |
| UP3      | Very small | Uniform   | Entire round | Opaque           | Flat      | Smooth        | White           |
| BDS2     | Medium     | Round     | Entire round | Transparent      | Flat      | Smooth        | -               |
| BR3      | Small      | Uniform   | Entire round | Transparent      | Convex    | Smooth-slums  | -               |
| BR4      | Large      | Regular   | Entire round | Opaque           | Convex    | Smooth        | Off white       |
| BR5      | Large      | Round     | Entire round | Opaque           | Convex    | Smooth        | Off white       |
| PDS1     | Small      | Uniform   | Entire round | Opaque           | Convex    | Smooth, Shiny | Greenish yellow |
| UP13     | Large      | Regular   | Entire round | Opaque           | Convex    | Smooth        | Off white       |
| PDS3     | Large      | Round     | Entire round | Opaque           | Convex    | Smooth        | Off white       |
| UP7      | Very small | Uniform   | Entire round | Opaque           | Flat      | Smooth        | White           |
| DL3      | Small      | Uniform   | Entire round | Transparent      | Convex    | Smooth-slums  | -               |

|     |        |         |              |                  |        |              |                 |
|-----|--------|---------|--------------|------------------|--------|--------------|-----------------|
| DL5 | Large  | Regular | Entire round | Opaque           | Convex | Smooth       | Off white       |
| DL1 | Medium | Round   | Entire round | Transparent      | Flat   | Smooth       | -               |
| DL8 | Small  | Uniform | Entire round | Semi-Transparent | Convex | Smooth-slums | Greenish yellow |

---
