# Supplementary material for: Screening and Biocontrol Potential of Rhizobacteria Native to Gangetic Plains and Hilly Regions to Induce Systemic Resistance and Promote Plant Growth in Chilli against Bacterial Wilt Disease
Source: MDPI journal article supplement (doi:10.3390/plants10102125), 2021-10-07
Supplement: s1 [file s1]

**SupplementaryTable S2.** Abundance and diversity index of rhizobacterial population isolated from rhizospheric soil on different microbiological media

| Rhizobacterial Population Avg.log (Cfu/g of soil) |                          |                              |                         |                            |                              |                         |                            |                              |                         |                                      |                              |                         |   |  |  |
|---------------------------------------------------|--------------------------|------------------------------|-------------------------|----------------------------|------------------------------|-------------------------|----------------------------|------------------------------|-------------------------|--------------------------------------|------------------------------|-------------------------|---|--|--|
| Agro-climatic regions                             | Nutrient Agar            | Number of bacteria types (n) | Shannon diversity index | Kings' B                   | Number of bacteria types (n) | Shannon diversity index | Tryptone soya agar         | Number of bacteria types (n) | Shannon diversity index | Casamino peptone glucose (CPG) media | Number of bacteria types (n) | Shannon diversity index |   |  |  |
| Upper Gangetic Plains Region                      | 9.64 ± 0.14 <sup>a</sup> | 9.00 ± 1.00                  | 0.23 ± 0.08             | ± 9.33 ± 0.09 <sup>c</sup> | 2.00 ± 0.00                  | 0.08 ± 0.03             | ± 9.47 ± 0.44 <sup>b</sup> | 5.00 ± 1.00                  | 0.16 ± 0.66             | ± 9.15 ± ± 0.72 <sup>d</sup>         | 2.00 ± 0.00                  | 0.08 ± 0.03             | ± |  |  |
| Western Himalayan Region                          | 9.58 ± 0.09 <sup>c</sup> | 8.00 ± 0.00                  | 0.22 ± 0.12             | ± 9.23 ± 0.16 <sup>d</sup> | 1.00 ± 1.00                  | 0.05 ± 0.10             | ± 9.40 ± 0.09 <sup>c</sup> | 2.00 ± 0.00                  | 0.08 ± 0.08             | 9.00 ± ± 0.06 <sup>e</sup>           | 1.00 ± 0.00                  | 0.05 ± 0.06             | ± |  |  |
| Middle Gangetic Plain Region                      | 9.65 ± 0.11 <sup>a</sup> | 12.00 ± 1.00                 | 0.27 ± 0.04             | ± 9.46 ± 0.12 <sup>a</sup> | 3.00 ± 0.00                  | 0.12 ± 0.06             | ± 9.37 ± 0.31 <sup>c</sup> | 6.00 ± 1.00                  | 0.18 ± 0.74             | ± 9.26 ± ± 0.09 <sup>c</sup>         | 3.00 ± 1.00                  | 0.12 ± 0.34             | ± |  |  |
| Trans-Ganga Plains Region                         | 9.62 ± 0.05 <sup>b</sup> | 10.00 ± 2.00                 | 0.24 ± 0.44             | ± 9.38 ± 0.54 <sup>b</sup> | 2.00 ± 1.00                  | 0.08 ± 0.08             | ± 9.51 ± 0.09 <sup>a</sup> | 4.00 ± 0.00                  | 0.14 ± 0.19             | 9.32 ± ± 0.79 <sup>b</sup>           | 3.00 ± 1.00                  | 0.12 ± 0.51             | ± |  |  |
| Southern Plateau and Hills region                 | 9.64 ± 0.08 <sup>a</sup> | 9.00 ± 0.00                  | 0.23 ± 0.12             | 9.45 ± 0.34 <sup>a</sup>   | 2.00 ± 0.00                  | 0.08 ± 0.24             | 9.48 ± 0.45 <sup>b</sup>   | 5.00 ± 1.00                  | 0.16 ± 0.04             | ± 9.37 ± ± 0.91 <sup>a</sup>         | 2.00 ± 1.00                  | 0.08 ± 0.07             |   |  |  |
| Total                                             |                          |                              | 1.17 ± 0.27             | ±                          |                              | 0.41 ± 0.24             | ±                          |                              | 0.71 ± 0.52             | ±                                    |                              | 0.43 ± 0.39             | ± |  |  |

\*Values given in column are the average of three replications followed by standard deviation. Values with different alphabetical (a–e) superscripts within a column are significantly different as determined by LSD test ( $\alpha=0.05$ ).
